# Supplementary material for: An enhanced whale optimization algorithm with improved dynamic opposite learning and adaptive inertia weight strategy
Source: Springer Nature journal article supplement (doi:10.1007/s40747-022-00827-1), 2022-08-01
Supplement: MOESM1 [file 23327236]

---

## Supplementary File

### **1 Content Description**

This file contains multiple sets of tests with different dimensions based on the 30 functions mentioned in this paper and details of tests on CEC 2019 problems. In part 2, Table S1, Table S2 and Table S3 present the test results with dimensions equal to 10, 50 and 100 on 30 functions, respectively. Part 3 shows the details of testing on CEC 2019. Part 3.1 introduces the details of test functions of CEC 2019 in Table S4. Part 3.2 presents the results of accuracy analysis, where the detailed results are shown in Table S5, and the results are confirmed by the Wilcoxon rank-sum tests shown in Table S6. Besides, the Friedman test results with the Holm procedure is presented in Table S7. Part 3.3 depicts the convergence behavior, where the convergence curves of all functions are shown in Fig. S1.

### **2 Multi-dimensional test results**

See Tables S1, S2 and S3.

Table S1: Results on unimodal/multimodal functions (10D).

|       |      | F1              | F2              | F3              | F4              | F5              | F6              |
|-------|------|-----------------|-----------------|-----------------|-----------------|-----------------|-----------------|
| WOA   | Mean | <b>0.00E+00</b> | 8.18E-215       | 7.48E-02        | 4.44E-14        | 5.24E+00        | 3.93E-05        |
|       | Std  | 0.00E+00        | 0.00E+00        | 1.58E-01        | 1.26E-13        | 1.05E+00        | 3.41E-05        |
| OWOA  | Mean | 9.29E-305       | 1.24E-164       | 1.41E-129       | 1.92E-120       | 4.76E+00        | 6.46E-04        |
|       | Std  | 0.00E+00        | 0.00E+00        | 5.42E-129       | 1.05E-119       | 3.34E-01        | 5.87E-04        |
| IWOA  | Mean | <b>0.00E+00</b> | <b>0.00E+00</b> | <b>0.00E+00</b> | <b>0.00E+00</b> | 4.15E+00        | 5.80E-05        |
|       | Std  | 0.00E+00        | 0.00E+00        | 0.00E+00        | 0.00E+00        | 6.20E-01        | 6.18E-05        |
| LWOA  | Mean | <b>0.00E+00</b> | <b>0.00E+00</b> | <b>0.00E+00</b> | <b>0.00E+00</b> | 6.95E+00        | 1.70E-05        |
|       | Std  | 0.00E+00        | 0.00E+00        | 0.00E+00        | 0.00E+00        | 4.75E-01        | 1.69E-05        |
| RDWOA | Mean | 7.29E-157       | 5.24E-13        | 3.05E-80        | 3.34E-46        | <b>2.79E+00</b> | 2.85E-04        |
|       | Std  | 3.99E-156       | 2.87E-12        | 1.67E-79        | 1.83E-45        | 1.50E+00        | 3.07E-04        |
| TLBO  | Mean | 5.87E+02        | 5.69E+00        | 9.14E+02        | 1.19E+01        | 9.27E+04        | 3.23E-03        |
|       | Std  | 4.34E+02        | 2.33E+00        | 7.14E+02        | 3.73E+00        | 1.30E+05        | 1.68E-03        |
| GWO   | Mean | 7.68E-240       | 3.19E-135       | 6.33E-109       | 1.57E-75        | 6.21E+00        | 1.76E-04        |
|       | Std  | 0.00E+00        | 8.86E-135       | 2.43E-108       | 5.09E-75        | 7.57E-01        | 1.36E-04        |
| MFO   | Mean | 1.77E-63        | 9.56E-39        | 1.21E-17        | 1.91E-01        | 1.11E+01        | 4.21E-03        |
|       | Std  | 7.69E-63        | 2.64E-38        | 2.59E-17        | 4.92E-01        | 3.13E+01        | 3.99E-03        |
| ETLBO | Mean | <b>0.00E+00</b> | 6.82E-162       | <b>0.00E+00</b> | 4.22E-157       | 8.88E+00        | 2.91E-04        |
|       | Std  | 0.00E+00        | 2.26E-161       | 0.00E+00        | 1.07E-156       | 2.27E-01        | 1.79E-04        |
| wPSO  | Mean | 4.49E-05        | 1.60E-02        | 2.10E-02        | 3.80E-01        | 1.44E+01        | 6.84E-01        |
|       | Std  | 1.04E-04        | 2.12E-02        | 4.18E-02        | 2.95E-01        | 2.56E+01        | 3.28E-01        |
| OABC  | Mean | 1.13E-16        | 7.73E-17        | 1.28E-01        | 1.12E+01        | 1.66E+01        | 2.46E-03        |
|       | Std  | 1.03E-16        | 1.24E-16        | 4.31E-01        | 1.61E+01        | 5.27E+01        | 1.05E-03        |
| EWOA  | Mean | <b>0.00E+00</b> | <b>0.00E+00</b> | <b>0.00E+00</b> | <b>0.00E+00</b> | 7.12E+00        | <b>1.68E-05</b> |
|       | Std  | 0.00E+00        | 0.00E+00        | 0.00E+00        | 0.00E+00        | 2.40E+00        | 1.35E-05        |
|       |      | 1               | 1               | 1               | 1               | 3               | 1               |
|       |      | F7              | F8              | F9              | F10             | F11             |                 |
| WOA   | Mean | <b>0.00E+00</b> | <b>8.88E-16</b> | 1.04E-02        | 6.15E-05        | 9.71E-04        |                 |
|       | Std  | 0.00E+00        | 0.00E+00        | 2.71E-02        | 3.23E-05        | 2.78E-03        |                 |
| OWOA  | Mean | <b>0.00E+00</b> | <b>8.88E-16</b> | <b>0.00E+00</b> | 2.36E-07        | 8.46E-03        |                 |
|       | Std  | 0.00E+00        | 0.00E+00        | 0.00E+00        | 1.20E-07        | 2.51E-02        |                 |
| IWOA  | Mean | <b>0.00E+00</b> | <b>8.88E-16</b> | <b>0.00E+00</b> | 1.97E-08        | 4.34E-03        |                 |
|       | Std  | 0.00E+00        | 0.00E+00        | 0.00E+00        | 2.16E-08        | 1.79E-02        |                 |
| LWOA  | Mean | <b>0.00E+00</b> | <b>8.88E-16</b> | <b>0.00E+00</b> | 3.36E-03        | 2.53E-02        |                 |
|       | Std  | 0.00E+00        | 0.00E+00        | 0.00E+00        | 8.56E-03        | 4.37E-02        |                 |
| RDWOA | Mean | <b>0.00E+00</b> | 1.01E-15        | 6.25E-03        | 1.86E-06        | <b>6.43E-06</b> |                 |
|       | Std  | 0.00E+00        | 6.49E-16        | 2.89E-02        | 4.43E-06        | 1.72E-05        |                 |
| TLBO  | Mean | 2.59E+01        | 8.17E+00        | 8.37E+00        | 2.69E+01        | 2.64E+04        |                 |
|       | Std  | 7.56E+00        | 2.96E+00        | 3.80E+00        | 7.75E+01        | 7.77E+04        |                 |
| GWO   | Mean | <b>0.00E+00</b> | 4.44E-15        | 1.38E-02        | 2.65E-03        | 2.43E-02        |                 |
|       | Std  | 0.00E+00        | 0.00E+00        | 2.10E-02        | 6.87E-03        | 4.93E-02        |                 |
| MFO   | Mean | 1.28E+01        | 4.32E-15        | 1.55E-01        | 1.45E-01        | 1.83E-03        |                 |
|       | Std  | 5.78E+00        | 6.49E-16        | 9.60E-02        | 2.27E-01        | 4.16E-03        |                 |
| ETLBO | Mean | <b>0.00E+00</b> | 2.78E-15        | <b>0.00E+00</b> | 2.25E-01        | 5.63E-01        |                 |
|       | Std  | 0.00E+00        | 1.80E-15        | 0.00E+00        | 1.73E-01        | 2.40E-01        |                 |
| wPSO  | Mean | 7.83E+00        | 1.41E+00        | 2.57E-01        | 9.96E-02        | 9.94E-03        |                 |
|       | Std  | 3.16E+00        | 9.22E-01        | 1.42E-01        | 1.67E-01        | 1.21E-02        |                 |
| OABC  | Mean | 6.63E-02        | 8.23E-15        | 2.12E-02        | <b>1.27E-16</b> | 3.66E-04        |                 |
|       | Std  | 2.52E-01        | 2.79E-15        | 1.46E-02        | 8.35E-17        | 2.01E-03        |                 |
| EWOA  | Mean | <b>0.00E+00</b> | <b>8.88E-16</b> | <b>0.00E+00</b> | 2.18E-02        | 8.69E-02        |                 |
|       | Std  | 0.00E+00        | 0.00E+00        | 0.00E+00        | 1.53E-02        | 5.73E-02        |                 |
| Rank  |      | 1               | 1               | 1               | 5               | 9               |                 |

Table S2: Results on unimodal/multimodal functions (50D).

|       |      | F1              | F2              | F3              | F4              | F5              | F6              |
|-------|------|-----------------|-----------------|-----------------|-----------------|-----------------|-----------------|
| WOA   | Mean | <b>0.00E+00</b> | 1.06E-206       | 1.38E+04        | 1.88E-06        | 4.68E+01        | 2.84E-05        |
|       | Std  | 0.00E+00        | 0.00E+00        | 6.42E+03        | 7.55E-06        | 5.49E-01        | 3.21E-05        |
| OWOA  | Mean | 4.57E-248       | 3.26E-141       | 3.57E-57        | 5.22E-93        | 4.58E+01        | 1.48E-03        |
|       | Std  | 0.00E+00        | 1.38E-140       | 1.41E-56        | 2.55E-92        | 6.75E-01        | 6.26E-04        |
| IWOA  | Mean | <b>0.00E+00</b> | <b>0.00E+00</b> | <b>0.00E+00</b> | <b>0.00E+00</b> | 4.49E+01        | 5.44E-05        |
|       | Std  | 0.00E+00        | 0.00E+00        | 0.00E+00        | 0.00E+00        | 8.97E-01        | 5.46E-05        |
| LWOA  | Mean | <b>0.00E+00</b> | <b>0.00E+00</b> | <b>0.00E+00</b> | <b>0.00E+00</b> | 4.74E+01        | 2.15E-05        |
|       | Std  | 0.00E+00        | 0.00E+00        | 0.00E+00        | 0.00E+00        | 4.84E-01        | 1.93E-05        |
| RDWOA | Mean | 2.25E-142       | 2.96E-48        | 1.01E-93        | 9.78E-53        | <b>3.41E+01</b> | 5.74E-04        |
|       | Std  | 1.12E-141       | 1.62E-47        | 5.37E-93        | 4.10E-52        | 1.91E+01        | 7.83E-04        |
| TLBO  | Mean | 1.12E+04        | 5.46E+01        | 2.20E+04        | 2.98E+01        | 4.92E+06        | 3.53E-03        |
|       | Std  | 2.59E+03        | 5.87E+00        | 1.10E+04        | 3.78E+00        | 2.57E+06        | 1.53E-03        |
| GWO   | Mean | 4.33E-91        | 7.69E-54        | 1.29E-17        | 4.02E-20        | 4.71E+01        | 6.23E-04        |
|       | Std  | 1.57E-90        | 1.44E-53        | 3.56E-17        | 4.45E-20        | 9.04E-01        | 4.66E-04        |
| MFO   | Mean | 1.12E-02        | 3.79E-03        | 2.51E+03        | 5.86E+01        | 1.72E+02        | 5.29E-01        |
|       | Std  | 5.77E-02        | 1.33E-02        | 9.93E+02        | 5.10E+00        | 1.32E+02        | 6.80E-01        |
| ETLBO | Mean | <b>0.00E+00</b> | 4.66E-163       | <b>0.00E+00</b> | 1.88E-158       | 4.89E+01        | 2.55E-04        |
|       | Std  | 0.00E+00        | 2.22E-162       | 0.00E+00        | 7.21E-158       | 2.50E-02        | 1.39E-04        |
| wPSO  | Mean | 8.06E+02        | 1.57E+01        | 8.03E+03        | 2.85E+01        | 1.12E+05        | 6.50E-01        |
|       | Std  | 2.71E+02        | 3.42E+00        | 2.27E+03        | 3.51E+00        | 7.50E+04        | 2.99E-01        |
| OABC  | Mean | 1.12E+03        | 5.77E-04        | 2.35E+04        | 7.92E+01        | 5.51E+06        | 3.43E-01        |
|       | Std  | 4.44E+03        | 4.49E-04        | 5.26E+03        | 7.88E+00        | 2.25E+07        | 2.78E-01        |
| EWOA  | Mean | <b>0.00E+00</b> | <b>0.00E+00</b> | <b>0.00E+00</b> | 2.77E-303       | 4.82E+01        | <b>1.49E-05</b> |
|       | Std  | 0.00E+00        | 0.00E+00        | 0.00E+00        | 0.00E+00        | 2.99E-01        | 1.41E-05        |
|       |      | 1               | 1               | 1               | 3               | 7               | 1               |
|       |      | F7              | F8              | F9              | F10             | F11             |                 |
| WOA   | Mean | <b>0.00E+00</b> | <b>8.88E-16</b> | 1.71E-03        | 1.96E-03        | 1.53E-01        |                 |
|       | Std  | 0.00E+00        | 0.00E+00        | 9.34E-03        | 1.28E-03        | 1.50E-01        |                 |
| OWOA  | Mean | <b>0.00E+00</b> | <b>8.88E-16</b> | <b>0.00E+00</b> | 4.57E-03        | 3.87E-01        |                 |
|       | Std  | 0.00E+00        | 0.00E+00        | 0.00E+00        | 5.23E-03        | 2.28E-01        |                 |
| IWOA  | Mean | <b>0.00E+00</b> | <b>8.88E-16</b> | <b>0.00E+00</b> | 3.91E-04        | 1.50E-01        |                 |
|       | Std  | 0.00E+00        | 0.00E+00        | 0.00E+00        | 1.49E-03        | 1.81E-01        |                 |
| LWOA  | Mean | <b>0.00E+00</b> | <b>8.88E-16</b> | <b>0.00E+00</b> | 1.45E-02        | 3.53E-01        |                 |
|       | Std  | 0.00E+00        | 0.00E+00        | 0.00E+00        | 1.05E-02        | 2.74E-01        |                 |
| RDWOA | Mean | <b>0.00E+00</b> | <b>8.88E-16</b> | 4.31E-11        | <b>3.70E-05</b> | <b>3.79E-03</b> |                 |
|       | Std  | 0.00E+00        | 0.00E+00        | 2.36E-10        | 1.68E-04        | 9.08E-03        |                 |
| TLBO  | Mean | 3.51E+02        | 1.36E+01        | 9.60E+01        | 3.73E+05        | 4.79E+06        |                 |
|       | Std  | 2.00E+01        | 6.59E-01        | 2.80E+01        | 4.94E+05        | 4.01E+06        |                 |
| GWO   | Mean | <b>0.00E+00</b> | 1.52E-14        | 7.24E-04        | 9.66E-02        | 1.62E+00        |                 |
|       | Std  | 0.00E+00        | 1.98E-15        | 2.85E-03        | 6.21E-02        | 2.90E-01        |                 |
| MFO   | Mean | 1.18E+02        | 3.19E+00        | 2.13E-01        | 7.68E-01        | 1.45E+00        |                 |
|       | Std  | 1.76E+01        | 1.20E+00        | 5.65E-01        | 1.06E+00        | 2.29E+00        |                 |
| ETLBO | Mean | 0.00E+00        | 2.66E-15        | 0.00E+00        | 9.33E-01        | 4.99E+00        |                 |
|       | Std  | 0.00E+00        | 1.81E-15        | 0.00E+00        | 1.64E-01        | 3.50E-02        |                 |
| wPSO  | Mean | 1.55E+02        | 9.38E+00        | 8.13E+00        | 4.73E+01        | 1.58E+04        |                 |
|       | Std  | 2.36E+01        | 1.07E+00        | 2.29E+00        | 3.20E+01        | 2.40E+04        |                 |
| OABC  | Mean | 5.43E+00        | 2.85E-01        | 1.52E+00        | 2.28E+06        | 9.30E+05        |                 |
|       | Std  | 1.42E+01        | 1.55E+00        | 8.21E+00        | 9.61E+06        | 2.18E+06        |                 |
| EWOA  | Mean | <b>0.00E+00</b> | <b>8.88E-16</b> | <b>0.00E+00</b> | 4.14E-02        | 7.11E-01        |                 |
|       | Std  | 0.00E+00        | 0.00E+00        | 0.00E+00        | 2.62E-02        | 4.19E-01        |                 |
| Rank  |      | 1               | 1               | 1               | 6               | 6               |                 |

Table S3: Results on unimodal/multimodal functions (100D).

|       |      | F1              | F2              | F3              | F4              | F5              | F6              |
|-------|------|-----------------|-----------------|-----------------|-----------------|-----------------|-----------------|
| WOA   | Mean | 2.58E-302       | 1.26E-208       | 1.22E+05        | 1.33E-07        | 9.71E+01        | 3.47E-05        |
|       | Std  | 0.00E+00        | 0.00E+00        | 5.80E+04        | 5.08E-07        | 5.87E-01        | 3.70E-05        |
| OWOA  | Mean | 7.54E-244       | 1.14E-135       | 1.77E-45        | 1.08E-88        | 9.59E+01        | 1.12E-03        |
|       | Std  | 0.00E+00        | 4.42E-135       | 8.64E-45        | 5.54E-88        | 7.72E-01        | 7.01E-04        |
| IWOA  | Mean | <b>0.00E+00</b> | <b>0.00E+00</b> | <b>0.00E+00</b> | <b>0.00E+00</b> | 9.52E+01        | 6.68E-05        |
|       | Std  | 0.00E+00        | 0.00E+00        | 0.00E+00        | 0.00E+00        | 9.51E-01        | 6.59E-05        |
| LWOA  | Mean | <b>0.00E+00</b> | <b>0.00E+00</b> | <b>0.00E+00</b> | <b>0.00E+00</b> | 9.77E+01        | 2.96E-05        |
|       | Std  | 0.00E+00        | 0.00E+00        | 0.00E+00        | 0.00E+00        | 3.55E-01        | 3.51E-05        |
| RDWOA | Mean | 2.36E-126       | 1.79E-67        | 5.90E-58        | 4.12E-42        | <b>7.09E+01</b> | 2.99E-04        |
|       | Std  | 1.29E-125       | 9.82E-67        | 3.23E-57        | 2.26E-41        | 4.10E+01        | 3.60E-04        |
| TLBO  | Mean | 2.36E+04        | 1.28E+02        | 9.52E+04        | 3.31E+01        | 1.29E+07        | 3.40E-03        |
|       | Std  | 3.48E+03        | 8.93E+00        | 3.60E+04        | 2.92E+00        | 3.34E+06        | 2.01E-03        |
| GWO   | Mean | 1.43E-63        | 9.48E-38        | 1.14E-04        | 5.32E-12        | 9.74E+01        | 1.09E-03        |
|       | Std  | 1.73E-63        | 7.41E-38        | 3.86E-04        | 7.02E-12        | 7.83E-01        | 5.62E-04        |
| MFO   | Mean | 6.25E+02        | 4.40E+00        | 3.78E+04        | 7.38E+01        | 4.15E+05        | 8.37E+00        |
|       | Std  | 6.51E+02        | 3.22E+00        | 7.61E+03        | 3.48E+00        | 7.68E+05        | 7.09E+00        |
| ETLBO | Mean | <b>0.00E+00</b> | 1.65E-162       | <b>0.00E+00</b> | 5.66E-160       | 9.90E+01        | 3.06E-04        |
|       | Std  | 0.00E+00        | 4.97E-162       | 0.00E+00        | 1.25E-159       | 2.01E-02        | 1.72E-04        |
| wPSO  | Mean | 8.08E+03        | 6.11E+01        | 4.32E+04        | 3.93E+01        | 2.97E+06        | 4.23E+00        |
|       | Std  | 1.23E+03        | 9.40E+00        | 7.63E+03        | 3.41E+00        | 9.07E+05        | 1.35E+00        |
| OABC  | Mean | 7.15E+03        | 1.69E+00        | 1.12E+05        | 8.98E+01        | 3.44E+07        | 3.82E+01        |
|       | Std  | 1.46E+04        | 5.69E+00        | 2.77E+04        | 5.18E+00        | 4.67E+07        | 6.10E+01        |
| EWOA  | Mean | <b>0.00E+00</b> | <b>0.00E+00</b> | <b>0.00E+00</b> | 7.83E-305       | 9.81E+01        | <b>2.01E-05</b> |
|       | Std  | 0.00E+00        | 0.00E+00        | 0.00E+00        | 0.00E+00        | 1.61E-01        | 1.67E-05        |
|       |      | 1               | 1               | 1               | 3               | 7               | 1               |
|       |      | F7              | F8              | F9              | F10             | F11             |                 |
| WOA   | Mean | <b>0.00E+00</b> | <b>8.88E-16</b> | <b>0.00E+00</b> | 5.91E-03        | 6.97E-01        |                 |
|       | Std  | 0.00E+00        | 0.00E+00        | 0.00E+00        | 1.93E-03        | 2.73E-01        |                 |
| OWOA  | Mean | <b>0.00E+00</b> | <b>8.88E-16</b> | <b>0.00E+00</b> | 7.12E-03        | 1.48E+00        |                 |
|       | Std  | 0.00E+00        | 0.00E+00        | 0.00E+00        | 5.62E-03        | 5.53E-01        |                 |
| IWOA  | Mean | <b>0.00E+00</b> | <b>8.88E-16</b> | <b>0.00E+00</b> | 3.57E-03        | 8.25E-01        |                 |
|       | Std  | 0.00E+00        | 0.00E+00        | 0.00E+00        | 3.41E-03        | 5.67E-01        |                 |
| LWOA  | Mean | <b>0.00E+00</b> | <b>8.88E-16</b> | <b>0.00E+00</b> | 3.09E-02        | 1.34E+00        |                 |
|       | Std  | 0.00E+00        | 0.00E+00        | 0.00E+00        | 3.99E-02        | 1.24E+00        |                 |
| RDWOA | Mean | <b>0.00E+00</b> | 1.01E-15        | <b>0.00E+00</b> | <b>5.66E-04</b> | <b>5.40E-03</b> |                 |
|       | Std  | 0.00E+00        | 6.49E-16        | 0.00E+00        | 1.33E-03        | 2.44E-02        |                 |
| TLBO  | Mean | 8.13E+02        | 1.43E+01        | 2.28E+02        | 1.76E+06        | 1.89E+07        |                 |
|       | Std  | 4.86E+01        | 5.90E-01        | 3.72E+01        | 1.20E+06        | 1.07E+07        |                 |
| GWO   | Mean | 1.89E-14        | 2.92E-14        | 1.69E-03        | 2.48E-01        | 6.08E+00        |                 |
|       | Std  | 4.31E-14        | 2.38E-15        | 4.63E-03        | 6.87E-02        | 3.94E-01        |                 |
| MFO   | Mean | 2.81E+02        | 1.07E+01        | 7.80E+00        | 5.19E+05        | 1.76E+06        |                 |
|       | Std  | 3.27E+01        | 2.58E+00        | 8.73E+00        | 1.51E+06        | 4.65E+06        |                 |
| ETLBO | Mean | <b>0.00E+00</b> | 3.02E-15        | 0.00E+00        | 1.08E+00        | 9.99E+00        |                 |
|       | Std  | 0.00E+00        | 1.77E-15        | 0.00E+00        | 9.18E-02        | 4.03E-03        |                 |
| wPSO  | Mean | 5.18E+02        | 1.31E+01        | 7.00E+01        | 1.78E+05        | 3.26E+06        |                 |
|       | Std  | 4.86E+01        | 7.91E-01        | 1.46E+01        | 1.32E+05        | 1.81E+06        |                 |
| OABC  | Mean | 3.23E+01        | 1.43E+00        | 7.49E+01        | 1.09E+08        | 2.01E+08        |                 |
|       | Std  | 1.22E+01        | 3.72E+00        | 1.93E+02        | 1.41E+08        | 2.67E+08        |                 |
| EWOA  | Mean | <b>0.00E+00</b> | <b>8.88E-16</b> | <b>0.00E+00</b> | 4.10E-02        | 1.53E+00        |                 |
|       | Std  | 0.00E+00        | 0.00E+00        | 0.00E+00        | 3.03E-02        | 8.33E-01        |                 |
| Rank  |      | 1               | 1               | 1               | 6               | 6               |                 |

---

### 3 Tests on CEC 2019 benchmarks

#### 3.1 Function description of CEC 2019

See Table S4.

Table S4: CEC 2019 test problems.

| No. | Functions                                    | D  | Search Range    |
|-----|----------------------------------------------|----|-----------------|
| 1   | Storn's Chebyshev Polynomial Fitting Problem | 9  | [-8192, 8192]   |
| 2   | Inverse Hilbert Matrix Problem               | 16 | [-16384, 16384] |
| 3   | Lennard-Jones Minimum Energy Cluster         | 18 | [-4,4]          |
| 4   | Rastrigin's Function                         | 10 | [-100,100]      |
| 5   | Griewangk's Function                         | 10 | [-100,100]      |
| 6   | Weierstrass Function                         | 10 | [-100,100]      |
| 7   | Modified Schwefel's Function                 | 10 | [-100,100]      |
| 8   | Expanded Schaffer's F6 Function              | 10 | [-100,100]      |
| 9   | Happy Cat Function                           | 10 | [-100,100]      |
| 10  | Ackley Function                              | 10 | [-100,100]      |

#### 3.2 Accuracy analysis

See Tables S5, S6 and S7.

#### 3.3 Convergence behavior

See Fig. S1

Table S5: Results on CEC 2019 problems

|             |      | F1       | F2       | F3       | F4       | F5       |
|-------------|------|----------|----------|----------|----------|----------|
| WOA         | Mean | 1136730  | 5406.56  | 3.915471 | 30.77151 | 1.276499 |
|             | Std  | 922087.2 | 2361.012 | 2.443677 | 12.68874 | 0.091078 |
| OWOA        | Mean | 779364.9 | 4653.333 | 2.499844 | 37.25132 | 1.300599 |
|             | Std  | 1106081  | 1458.837 | 1.142788 | 12.24921 | 0.177698 |
| IWOA        | Mean | 1        | 4.972495 | 5.984107 | 78.88697 | 69.49849 |
|             | Std  | 0        | 0.070917 | 0.321113 | 5.712161 | 5.985289 |
| LWOA        | Mean | 1        | 4.707167 | 3.505091 | 41.47247 | 4.265642 |
|             | Std  | 0        | 0.359144 | 1.267259 | 12.16756 | 1.157581 |
| RDWOA       | Mean | 316.0575 | 225.3075 | 2.81854  | 34.64596 | 1.603115 |
|             | Std  | 608.372  | 116.3398 | 2.469398 | 12.81126 | 0.278692 |
| <b>EWOA</b> | Mean | 1        | 4.629993 | 1.327308 | 31.25582 | 1.421748 |
|             | Std  | 0        | 0.37009  | 0.163654 | 11.38734 | 0.20662  |
| Rank        |      | 1        | 1        | 1        | 2        | 2        |
|             |      | F6       | F7       | F8       | F9       | F10      |
| WOA         | Mean | 5.228556 | 1027.869 | 3.866849 | 1.21714  | 17.5457  |
|             | Std  | 1.287408 | 330.2903 | 0.460375 | 0.083124 | 6.460649 |
| OWOA        | Mean | 6.103254 | 761.4645 | 4.110753 | 1.227723 | 16.04797 |
|             | Std  | 1.522155 | 267.7764 | 0.276818 | 0.077846 | 7.565816 |
| IWOA        | Mean | 8.119862 | 1453.994 | 4.696449 | 1.731149 | 21.26931 |
|             | Std  | 0.477117 | 127.1673 | 0.156455 | 0.279334 | 0.087608 |
| LWOA        | Mean | 7.439611 | 1262.555 | 4.18032  | 1.351483 | 21.17994 |
|             | Std  | 0.954562 | 303.978  | 0.361467 | 0.13281  | 0.117611 |
| RDWOA       | Mean | 5.413942 | 1101.973 | 4.437798 | 1.292702 | 21.00488 |
|             | Std  | 1.160805 | 257.5754 | 0.396312 | 0.127134 | 0.008393 |
| <b>EWOA</b> | Mean | 4.428849 | 732.6278 | 3.586337 | 1.193317 | 12.31261 |
|             | Std  | 0.891604 | 218.4377 | 0.255233 | 0.063455 | 8.67736  |
| Rank        |      | 1        | 1        | 1        | 1        | 1        |

Table S6: The results of wilcoxon's rank sum test

| Function | EWOA Vs. |          |          |          |          |          |
|----------|----------|----------|----------|----------|----------|----------|
|          |          | WOA      | OWOA     | IWOA     | LWOA     | RDWOA    |
| F1       | <i>p</i> | 6.39E-05 | 6.39E-05 | NaN      | NaN      | 7.79E-02 |
|          | <i>h</i> | 1        | 1        | 0        | 0        | 0        |
| F2       | <i>p</i> | 1.63E-04 | 1.63E-04 | 3.32E-01 | 4.82E-01 | 1.63E-04 |
|          | <i>h</i> | 1        | 1        | 0        | 0        | 1        |
| F3       | <i>p</i> | 1.83E-04 | 1.83E-04 | 1.83E-04 | 1.83E-04 | 7.28E-03 |
|          | <i>h</i> | 1        | 1        | 1        | 1        | 1        |
| F4       | <i>p</i> | 9.70E-01 | 5.21E-01 | 1.83E-04 | 1.62E-01 | 4.73E-01 |
|          | <i>h</i> | 0        | 0        | 1        | 0        | 0        |
| F5       | <i>p</i> | 8.90E-02 | 8.90E-02 | 1.83E-04 | 1.83E-04 | 1.86E-01 |
|          | <i>h</i> | 0        | 0        | 1        | 1        | 0        |
| F6       | <i>p</i> | 1.62E-01 | 1.13E-02 | 1.83E-04 | 1.83E-04 | 8.90E-02 |
|          | <i>h</i> | 0        | 1        | 1        | 1        | 0        |
| F7       | <i>p</i> | 2.11E-02 | 5.21E-01 | 1.83E-04 | 2.20E-03 | 1.73E-02 |
|          | <i>h</i> | 1        | 0        | 1        | 1        | 1        |
| F8       | <i>p</i> | 2.73E-01 | 1.01E-03 | 1.83E-04 | 3.61E-03 | 1.71E-03 |
|          | <i>h</i> | 0        | 1        | 1        | 1        | 1        |
| F9       | <i>p</i> | 3.85E-01 | 3.45E-01 | 1.83E-04 | 5.80E-03 | 1.04E-01 |
|          | <i>h</i> | 0        | 0        | 1        | 1        | 0        |
| F10      | <i>p</i> | 1.40E-01 | 1.62E-01 | 1.83E-04 | 1.83E-04 | 1.83E-04 |
|          | <i>h</i> | 0        | 0        | 1        | 1        | 1        |

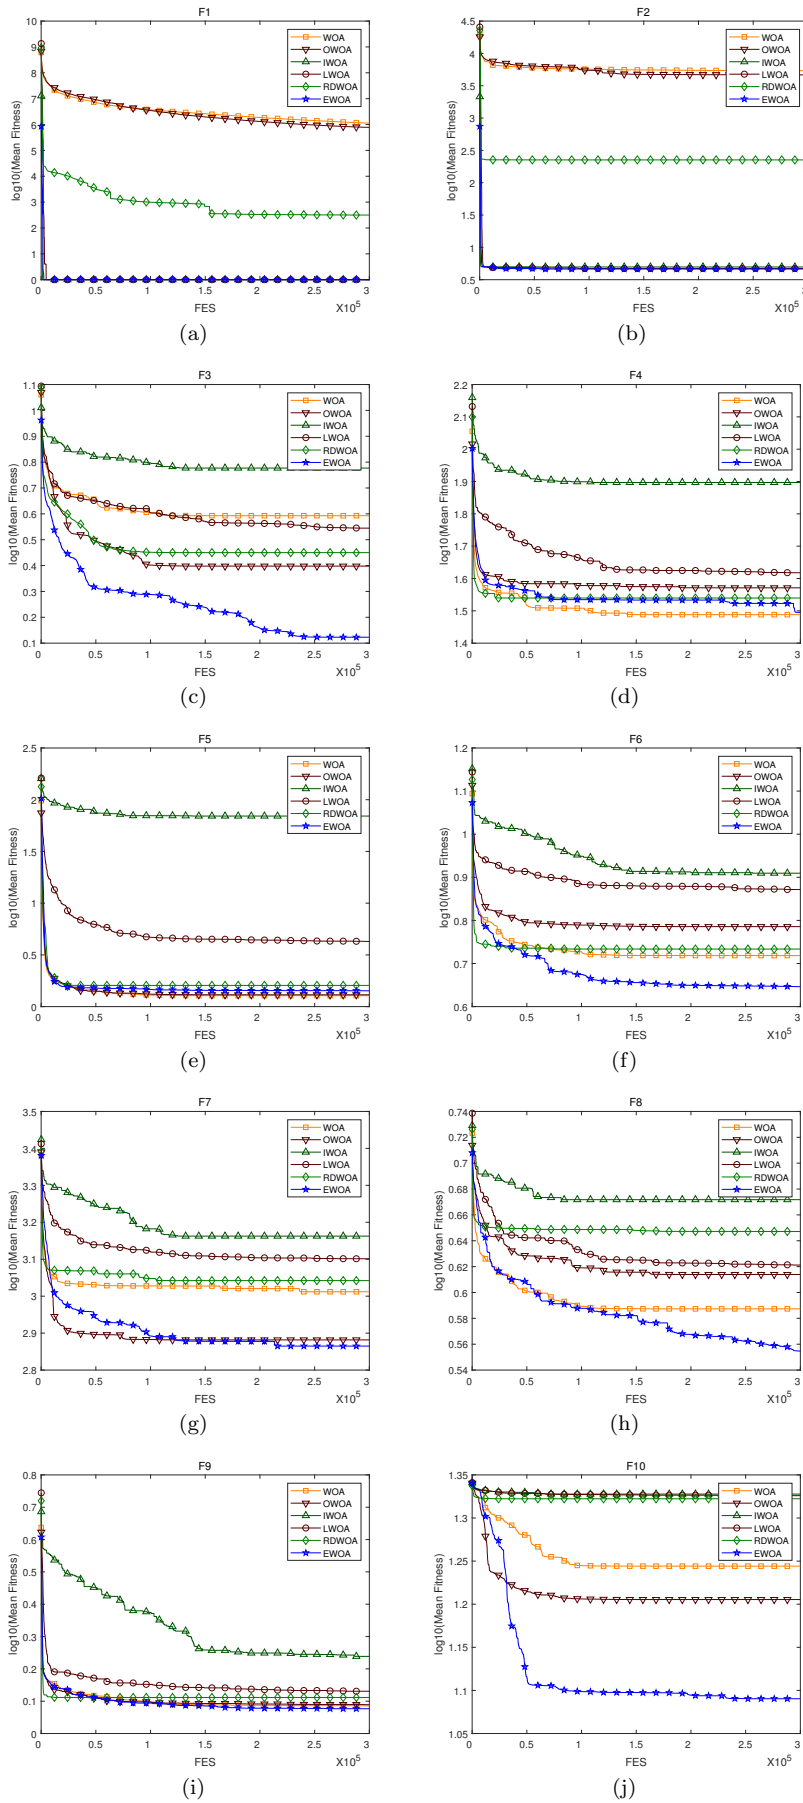

Fig. S1: Convergence trends of EWOA and compared algorithms on CEC 2019 functions.

Table S7: Friedman tests on CEC 2019.

| i | Algorithms  | Average ranking | $z = (R_0 - R_i) / SE$ | unadjusted $p$ | $p_{Holm}$ |
|---|-------------|-----------------|------------------------|----------------|------------|
| 6 | IWOA        | 5.3             | 4.661392               | 0.000003       | 0.000016   |
| 5 | LWOA        | 4.2             | 3.34664                | 0.000818       | 0.003272   |
| 4 | RDWOA       | 3.8             | 2.868549               | 0.004124       | 0.012371   |
| 3 | OWOA        | 3.2             | 2.151411               | 0.031444       | 0.062887   |
| 2 | WOA         | 3.1             | 2.031889               | 0.042165       | 0.062887   |
| 1 | <b>EWOA</b> | 1.4             |                        |                |            |
